# Supplementary material for: Gene Network Analysis to Determine the Effects of Antioxidant Treatment in a Rat Model of Neonatal Hypoxic-Ischemic Encephalopathy
Source: Springer Nature journal article supplement (doi:10.1007/s12031-010-9337-x), 2010-02-26
Supplement: MOESM4 [file 12031_2010_9337_MOESM4_ESM.xls]

## Sheet: Sheet0
Table S4. MCI-186 up regulated genes
Symbol	Entrez Gene Name
4930474N05RIK	RIKEN cDNA 4930474N05 gene
A4GNT	alpha-1,4-N-acetylglucosaminyltransferase
ATXN2	ataxin 2
B020017C02RIK	RIKEN cDNA B020017C02 gene
BTBD16	BTB (POZ) domain containing 16
CD209B	CD209b antigen
CHRNA6	cholinergic receptor, nicotinic, alpha 6
CNTNAP5 (includes EG:129684)	contactin associated protein-like 5
CPVL	carboxypeptidase, vitellogenic-like
CST11	cystatin 11
CTSJ	cathepsin J
DSC2	desmocollin 2
DSG1	desmoglein 1
ELF2	E74-like factor 2 (ets domain transcription factor)
ENPP3	ectonucleotide pyrophosphatase/phosphodiesterase 3
GM1082	predicted gene 1082
GM4846	predicted gene 4846
GM52	predicted gene 52
HS3ST3B1	heparan sulfate (glucosamine) 3-O-sulfotransferase 3B1
IGHE	immunoglobulin heavy constant epsilon
INHBE	inhibin, beta E
ITGA3	integrin, alpha 3 (antigen CD49C, alpha 3 subunit of VLA-3 receptor)
KCNE4	potassium voltage-gated channel, Isk-related family, member 4
KIF11	kinesin family member 11
KLF17	Kruppel-like factor 17
KLK7	kallikrein-related peptidase 7
LOC360933	similar to Ac1591
LOC501417	hypothetical gene supported by BC059164
LOC689212	similar to Cystatin S precursor (LM protein)
MGC72627	similar to RIKEN cDNA A330021E22
MRAP	melanocortin 2 receptor accessory protein
MUC5B	mucin 5B, oligomeric mucus/gel-forming
OLFR124	olfactory receptor 124
OLFR533	olfactory receptor 533
OLFR599	olfactory receptor 599
OLFR61	olfactory receptor 61
OLFR668	olfactory receptor 668
OLFR813	olfactory receptor 813
OLR1070	olfactory receptor 1070
OLR488	olfactory receptor 488
OR2W1	olfactory receptor, family 2, subfamily W, member 1
OR2W3	olfactory receptor, family 2, subfamily W, member 3
OR4A47	olfactory receptor, family 4, subfamily A, member 47
OVOS2	ovostatin 2
PROS1	protein S (alpha)
QRFPR	pyroglutamylated RFamide peptide receptor
RGD1307158	similar to oocyte-testis gene 1
RGD1564750 PREDICTED	vomeronasal 2 receptor, 69
SPAG11A (includes EG:78128)	sperm associated antigen 11A
TBC1D8B	TBC1 domain family, member 8B (with GRAM domain)
TGM3	transglutaminase 3 (E polypeptide, protein-glutamine-gamma-glutamyltransferase)
TGM6	transglutaminase 6
TMEM225	transmembrane protein 225
TMEM71	transmembrane protein 71
TRIM58	tripartite motif-containing 58
WDR52	WD repeat domain 52
WDR88	WD repeat domain 88
